# Supplementary material
Source: publisher figshare collection journal article supplement (https://gsapubs.figshare.com/ndownloader/files/35908439)
Supplement: Supplementary file 1 [file 35908439]

## Sheet: observed modes+calculated WR
Observed mineral modes (%) by points counting and reconstructed whole-rock compositions (wt.%) for the Jiaohe peridotites.
Sample	Points counting	Ol	Opx	Cpx	Sp	SiO2	TiO2	Al2O3	Cr2O3	FeO	MnO	MgO	CaO	Na2O	K2O	NiO	Total
17DSH01	625	62	25	10	3	44.77	0.07	3.22	0.59	8.22	0.15	40.19	2.2	0.17	-	0.24	99.82
17DSH02	625	59	27	12	2	45.57	0.12	3.29	0.32	8.63	0.14	38.85	2.48	0.26	-	0.27	99.93
17DSH03	625	59	26	12	3	45.11	0.1	3.45	0.46	8.27	0.12	39.36	2.56	0.15	-	0.25	99.83
17DSH04	625	58	29	10	3	45.32	0.07	3.65	0.46	8.29	0.14	39.37	2.27	0.19	-	0.27	100.03
17DSH05	625	65	25	7	3	44.23	0.06	3.11	0.49	8.29	0.13	41.15	1.57	0.15	-	0.26	99.44
17DSH06	500	58	30	9	3	45.68	0.04	2.98	0.45	8.26	0.13	39.89	2.26	0.09	-	0.28	100.06
17DSH07	500	60	27	10	3	45.01	0.07	3.3	0.49	8.3	0.14	39.29	2.33	0.18	-	0.3	99.41
17DSH08	500	56	31	11	2	45.76	0.08	3.28	0.4	8.27	0.15	38.84	2.39	0.17	-	0.26	99.6
17DSH09	500	66	25	7	2	44.71	0.03	2.19	0.41	8.16	0.13	40.95	1.76	0.05	-	0.28	98.67
17DSH10	500	57	29	12	2	45.62	0.11	3.31	0.34	8.23	0.15	38.61	2.44	0.23	-	0.29	99.33
17DSH11	400	61	29	8	2	45.66	0.04	2.59	0.4	8.35	0.15	40.35	1.87	0.08	-	0.29	99.78
17DSH12	400	66	24	7	3	44.24	0.03	2.86	0.48	8.52	0.12	41.24	1.71	0.09	-	0.3	99.59
17DSH13	400	62	29	7	2	44.88	0.03	2.67	0.51	7.99	0.13	40.87	1.66	0.06	-	0.27	99.07
17DSH14	400	57	30	10	3	44.74	0.1	3.58	0.38	8.4	0.13	39.14	2.22	0.2	0.02	0.25	99.14
17DSH15	400	61	27	9	3	44.5	0.07	3.22	0.4	8.65	0.14	39.87	2.1	0.19	-	0.28	99.42
17DSH16	400	67	25	6	2	44.15	0.05	2.52	0.38	8.87	0.13	41.93	1.3	0.13	-	0.3	99.76
17DSH17	400	80	17	2	1	42.97	0	0.69	0.7	9.05	0.12	45.13	0.46	0.06	-	0.31	99.49
17DSH18	400	81	16	2	1	43.3	0.01	0.58	0.6	9.45	0.15	45.43	0.45	0.06	-	0.32	100.35
17DSH19	400	80	17	2	1	43.82	0.01	0.61	0.48	8.26	0.13	45.79	0.41	0.03	-	0.36	99.9
17DSH20	400	83	15	1	1	43.71	0	0.57	0.42	8.1	0.14	46.8	0.4	0.01	-	0.37	100.52
"-" denotes not available due to very low contents.
Calculated mineral modes (%) from Table 1 and measured whole-rock compositions (wt.%) from Table S1 for the Jiaohe peridotites.
Sample		Ol	Opx	Cpx	Sp	SiO2	TiO2	Al2O3	Cr2O3	FeO	MnO	MgO	CaO	Na2O	K2O	NiO	Total
17DSH01		63	23	12	2	44.55	0.09	2.6	0.44	8.21517	0.14	39.38	2.67	0.26	0.02	0.24	98.61
17DSH02		58	25	15	2	45.05	0.15	3.46	0.34	8.5391	0.14	37.52	3.1	0.35	0.03	0.22	98.9
17DSH03		61	23	13	3	44.13	0.12	3.19	0.37	8.43113	0.14	38.57	2.78	0.31	0.03	0.23	98.3
17DSH04		60	26	12	2	44.87	0.1	2.85	0.39	8.50311	0.14	38.66	2.77	0.27	0.05	0.24	98.84
17DSH05		66	23	9	2	44.29	0.08	2.36	0.39	8.29616	0.13	40.68	2.07	0.23	0.02	0.26	98.81
17DSH06		59	28	12	2	45.15	0.05	2.52	0.39	8.44912	0.14	38.86	2.85	0.18	0.03	0.24	98.86
17DSH07		61	24	13	2	44.94	0.09	2.81	0.4	8.39513	0.14	38.76	2.92	0.26	0.03	0.24	98.99
17DSH08		57	28	13	2	45.17	0.09	3.12	0.36	8.32315	0.14	38.15	2.76	0.28	0.03	0.22	98.64
17DSH09		67	22	9	2	44.22	0.05	2.42	0.39	8.48511	0.14	40.47	2.19	0.12	0.02	0.24	98.75
17DSH10		58	25	15	2	45.25	0.13	3.23	0.35	8.26916	0.14	37.72	3.17	0.34	0.03	0.22	98.85
17DSH11		62	26	10	2	44.83	0.06	2.56	0.37	8.5571	0.14	39.74	2.32	0.17	0.02	0.24	99.01
17DSH12		67	21	10	2	43.66	0.05	2.6	0.4	8.5301	0.14	40.34	2.32	0.16	0.02	0.25	98.47
17DSH13		63	26	9	2	44.77	0.05	2.27	0.4	8.1072	0.14	40.46	2.19	0.15	0.02	0.25	98.81
17DSH14		58	27	13	2	44.67	0.12	3.14	0.37	8.5481	0.14	38.56	2.74	0.33	0.03	0.23	98.88
17DSH15		62	24	12	2	44.4	0.07	2.85	0.34	8.76405	0.14	39.5	2.52	0.26	0.02	0.23	99.09
17DSH16		68	22	8	2	44.08	0.05	2.51	0.34	9.12397	0.14	41.7	1.73	0.18	0.02	0.26	100.13
17DSH17		82	15	2	1	42.11	0.01	1.02	0.44	9.30393	0.16	44.67	0.59	0.14	0.04	0.28	98.76
17DSH18		83	14	2	1	42.04	0.02	0.84	0.4	9.53788	0.16	44.43	0.68	0.12	0.05	0.29	98.57
17DSH19		81	16	2	1	42.89	0.01	0.86	0.47	8.5391	0.14	45.26	0.56	0.1	0.02	0.29	99.14
17DSH20		84	13	2	1	42.16	0.01	0.92	0.59	8.28716	0.13	45.62	0.58	0.08	0.04	0.3	98.72
